# Supplementary material
Source: Springer Nature journal article supplement (https://www.springermedizin.de/resource/supplementary/13012_2011_442_MOESM7_ESM.pdf/9630150)
Supplement: MOESM7 [file 9630150]

| Training needs |                        | Collaborative tasks | Knowledge                            | Attitudes                                                                                   | Skills                                                                                    | Tools                                                                             |                                                     |                                     |
|----------------|------------------------|---------------------|--------------------------------------|---------------------------------------------------------------------------------------------|-------------------------------------------------------------------------------------------|-----------------------------------------------------------------------------------|-----------------------------------------------------|-------------------------------------|
| ASSESSMENT     | SHARED DECISION MAKING | FACILITATING ACCESS | Explore Problems                     | What is an illness trajectory?                                                              | Value patient individuality and variability                                               | Explore reasons for visit                                                         | PRISMS                                              |                                     |
|                |                        |                     | Establish Priorities                 | How can patients be assessed in terms of self-management progress?                          | Value patient involvement                                                                 | Explore progress (acknowledge patient's current strategies and prior experiences) |                                                     |                                     |
|                |                        |                     | Make Sense of Problems               |                                                                                             |                                                                                           | Explore ideas, concerns, expectations and attitudes                               | Identify key problems/ issues to be addressed       | PRISMS linking to Explanatory Model |
|                |                        |                     | Share the Process of Decision Making | What is the evidence base about involving patients in decision making?                      | Value importance of patient increasing knowledge, extending experience, & gaining support | Connect problems                                                                  | Check understanding                                 | Explanatory Model                   |
|                |                        |                     | Negotiate a Plan of Action           | Do you have knowledge of resources available in the practice, wider community and internet? |                                                                                           | Consider behavioural change                                                       | Identify what is achievable                         |                                     |
|                |                        |                     | Negotiate Follow up                  |                                                                                             |                                                                                           | Explore genuine options for achieving priorities                                  | Provide information about options                   | Menu of Options                     |
|                |                        |                     |                                      |                                                                                             |                                                                                           | Clarify patient values (pros and cons), highlight discrepancies                   | Agree what patient and professional are going to do | Plan of Action                      |
|                |                        |                     |                                      | Summarise and rehearse                                                                      |                                                                                           |                                                                                   |                                                     |                                     |
|                |                        |                     |                                      | Safety net                                                                                  |                                                                                           |                                                                                   |                                                     |                                     |
|                |                        |                     |                                      | Negotiate and establish a plan for follow up                                                | Plan of Action                                                                            |                                                                                   |                                                     |                                     |
